# Supplementary material
Source: Springer Nature journal article supplement (https://www.springerprofessional.de/resource/supplementary/13638_2014_1072_MOESM9_ESM.pdf/11899020)

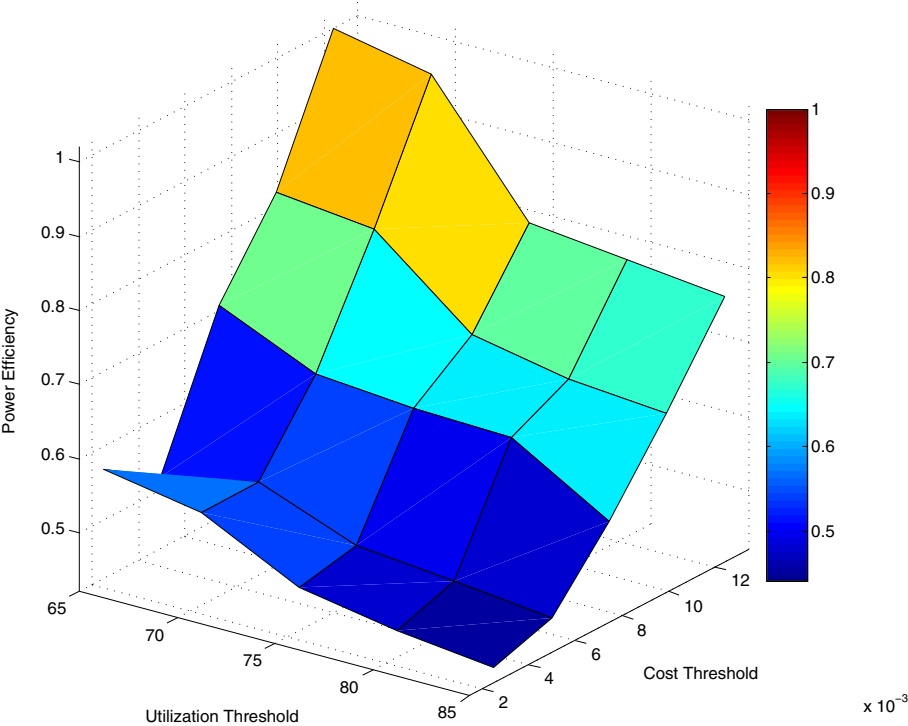

Supplement: MOESM9 [file 11899020]
